# Supplementary material for: Macrocystis pyrifera Lipids Reduce Cytokine-Induced Pro-Inflammatory Signalling and Barrier Dysfunction in Human Keratinocyte Models
Source: MDPI journal article supplement (doi:10.3390/ijms242216383), 2023-11-16
Supplement: s1 [file s1]

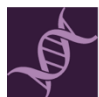

---

Supplementary Materials

## ***Macrocystis pyrifera* lipids reduce cytokine-stimulated pro-inflammatory signalling and barrier dysfunction in human keratinocyte models**

Jamie Mei-Lin Kok<sup>1</sup>, Georgina Dowd<sup>2</sup>, Jaydee Cabral<sup>3</sup> and Lyn Wise<sup>1,\*</sup>

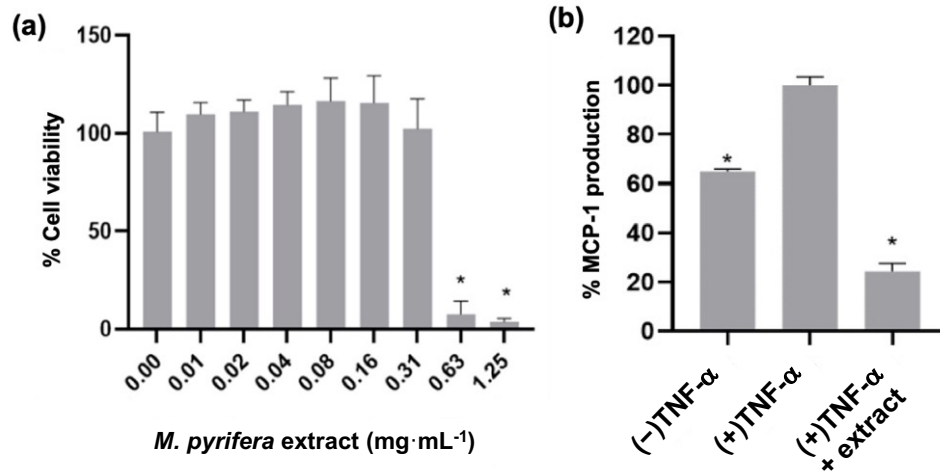

**Figure S1.** *Macrocystis pyrifera* lipid extract batch #2 suppresses chemokine production in TNF- $\alpha$ -stimulated HaCaT cell monolayers. **(a)** Cells were incubated with varying concentrations of freshly prepared *M. pyrifera* extract with biomass assessed by crystal violet staining after 24 h incubation. Values are expressed relative to the vehicle-only control (0 mg·mL<sup>-1</sup>). **(b)** Cells were stimulated with TNF- $\alpha$  (20 ng·mL<sup>-1</sup>) with or without 2 h pre-treatment with extract (0.16 mg·mL<sup>-1</sup>). After 24 h incubation, the conditioned medium was collected and assayed for MCP-1 production by ELISA. (-) represents unstimulated cells. (+) represents cells stimulated with TNF- $\alpha$  only. Values are expressed as percentages of the **(a)** vehicle or **(b)** (+) controls and presented as means  $\pm$  SD ( $n = 3$ ), with those that differ significantly from those controls identified by one-way ANOVA followed by a Dunnett's test (\* $p \leq 0.05$ ).

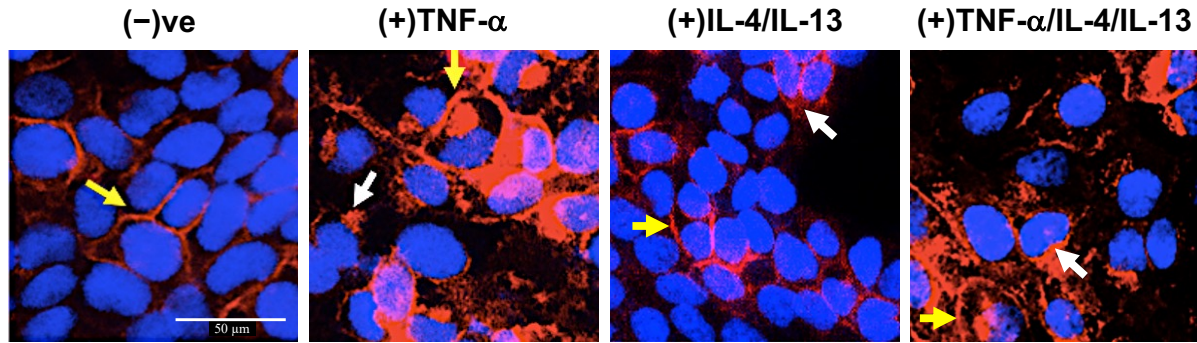

**Figure S2.** Concurrent stimulation with Th1 and Th2 cytokines produces the greatest disruption to claudin-1 tight junction in HaCaT cell monolayers. Cells were incubated for 24 h with TNF- $\alpha$  (20 ng·mL<sup>-1</sup>), with or without IL-4 (50 ng·mL<sup>-1</sup>) and IL-13 (50 ng·mL<sup>-1</sup>). Cells were fixed then tight junctions stained using rabbit anti-claudin-1 and anti-rabbit Alexa Fluor®594 antibodies (red), with nuclei stained using DAPI (blue). Representative images are shown, with yellow and white arrows indicating intact and disrupted tight junctions, respectively. (-) represents unstimulated cells. (+) represents cells stimulated with cytokines. Scale bar, 50  $\mu$ m.

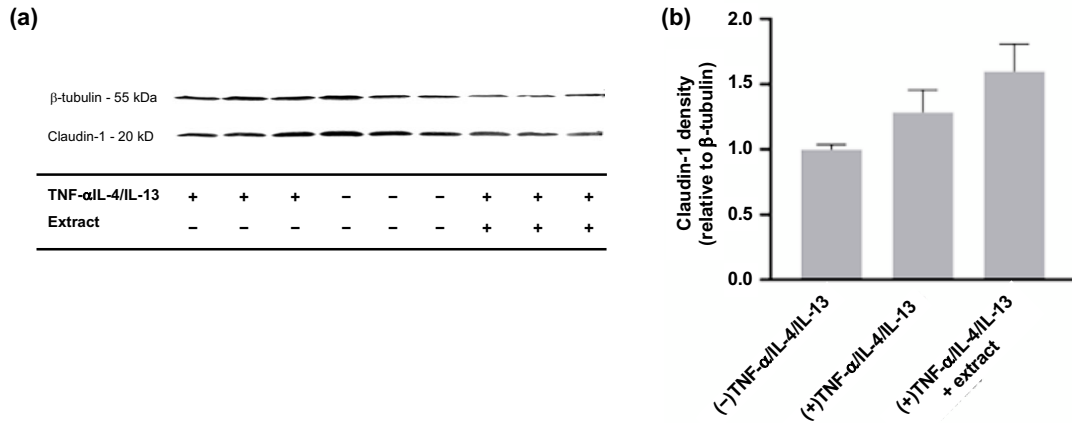

**Figure S3.** *Macrocystis pyrifera* lipid pre-treatment does not affect claudin-1 protein abundance in cytokine-stimulated HaCaT cell monolayers. Cells were incubated for 24 h with TNF- $\alpha$  (20 ng·mL<sup>-1</sup>), IL-4 (50 ng·mL<sup>-1</sup>) and IL-13 (50 ng·mL<sup>-1</sup>), with or without 2 h pre-treatment with *M. pyrifera* extract (0.16 mg·mL<sup>-1</sup>). (a) Western blot analyses were performed on cell lysates using rabbit anti-claudin-1 and goat-anti-rabbit-HRP antibodies. (b) Band densities were determined from (a). (-) represents unstimulated cells. (+) represents cells stimulated with cytokines. Values are expressed relative to the (+) control and loading control ( $\beta$ -tubulin) and presented as mean  $\pm$  SD ( $n = 3$ ), with those that differ significantly from the (+) control identified by one-way ANOVA followed by a Dunnett's test (\* $P \leq 0.05$ ).

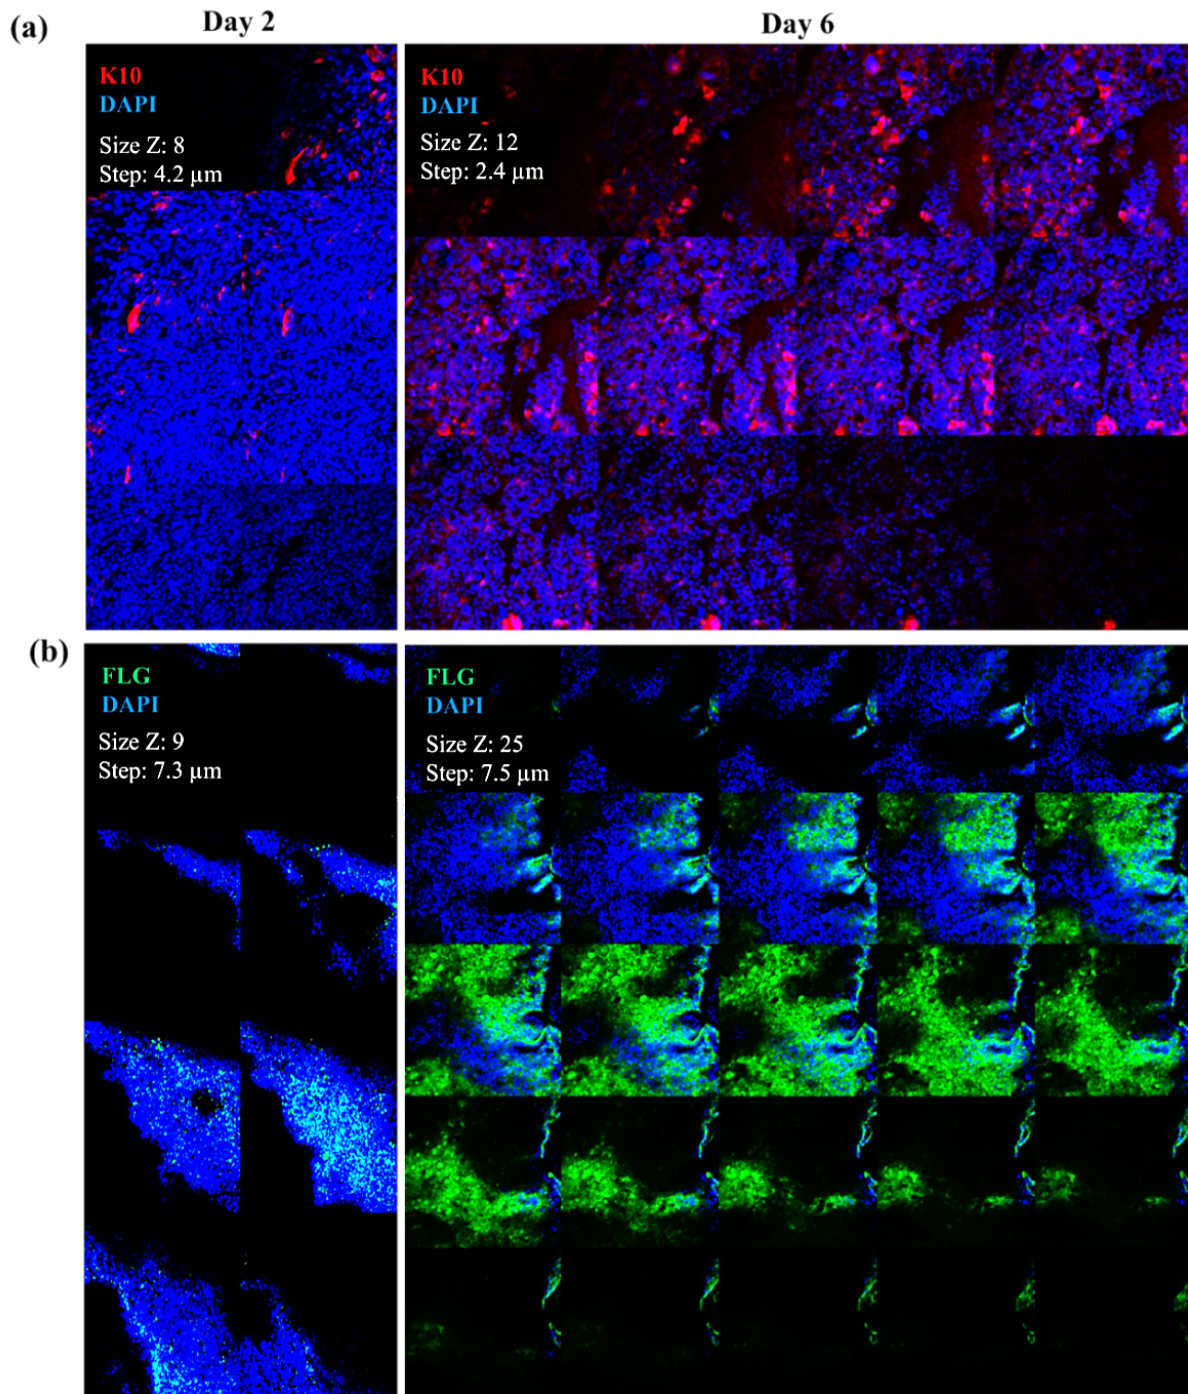

**Figure S4.** Analysis of cell differentiation within 3D epidermal constructs. HaCaT cells were cultured for 2 days immersed in proliferation media, followed by 6 days of culture at the air liquid interface on differentiation media. At day 2 and 6 of differentiation, the constructs were whole-mount stained with rabbit **(a)** anti-keratin 10 (K10) or **(b)** anti-filaggrin (FLG) and anti-rabbit Alexa Fluor®-594 (red) or Alexa Fluor®-488 (green) antibodies, respectively, and nuclei stained with DAPI (blue). Representative montages of optical slices from confocal Z-stacks of stained cells are shown. The number and depth of slices are indicated.

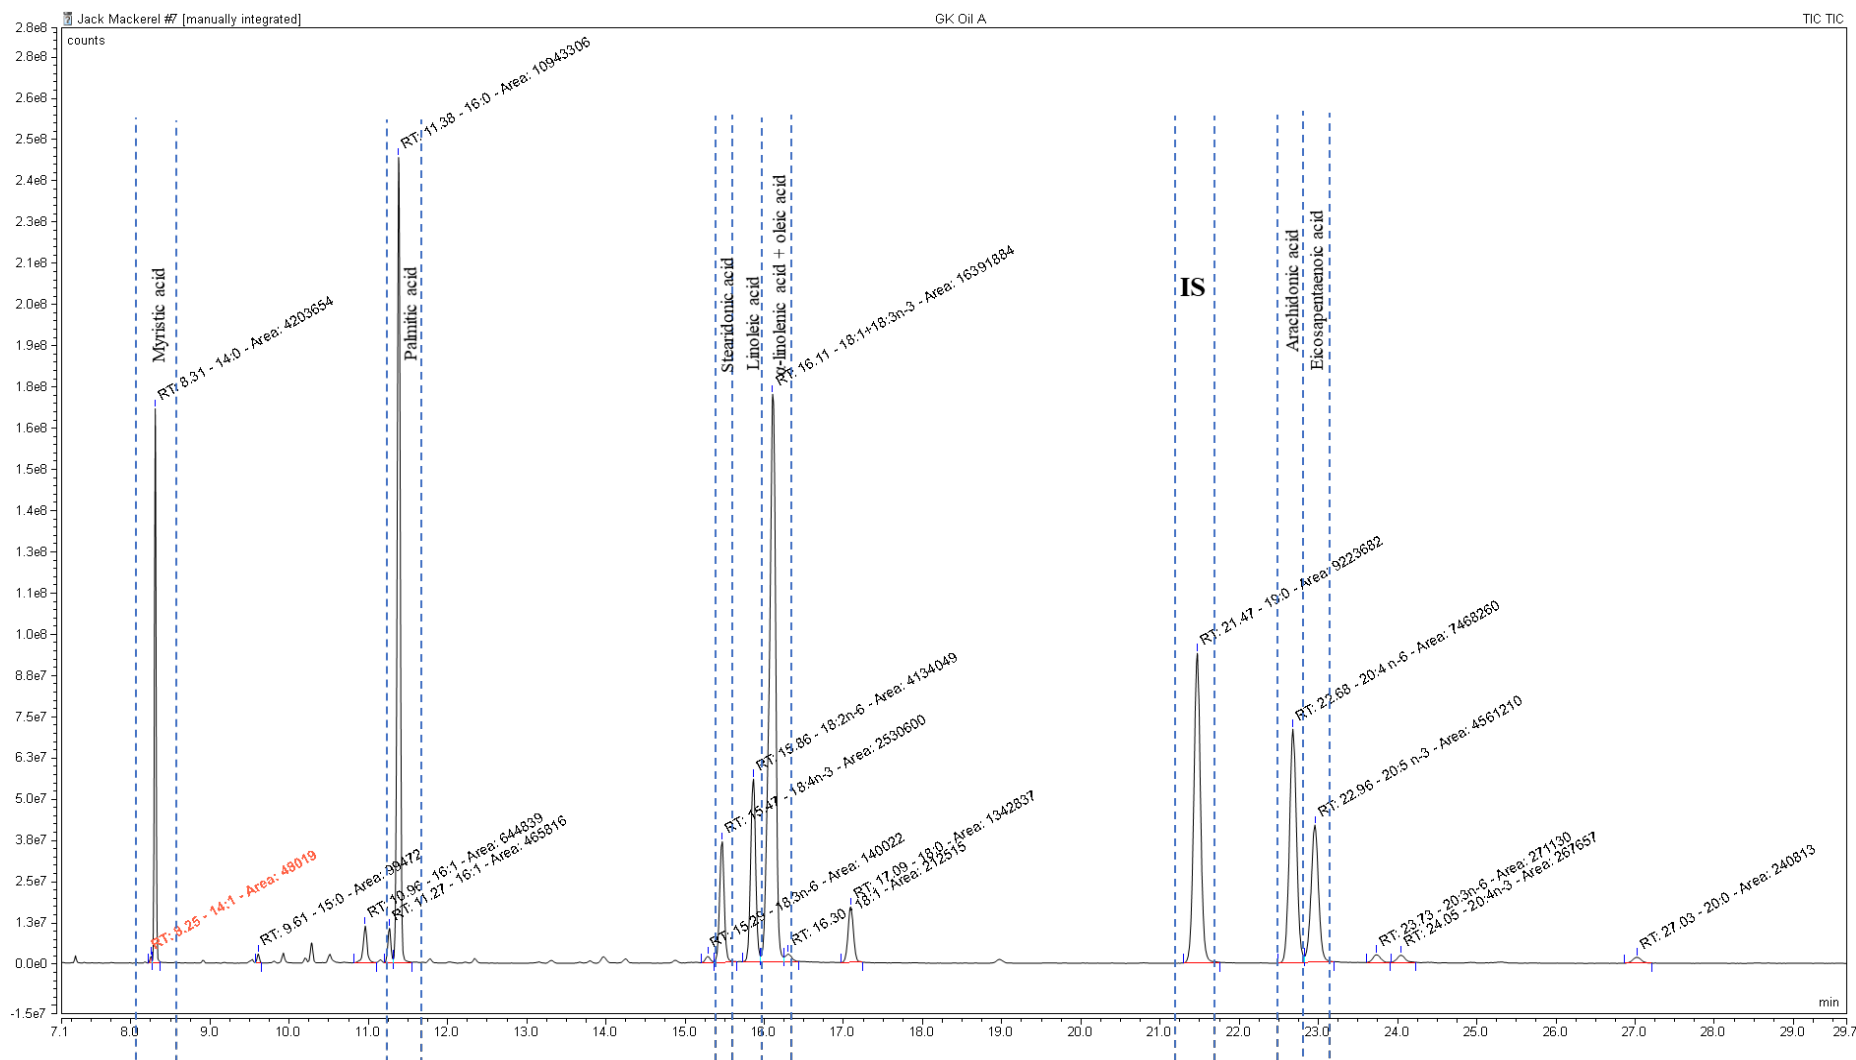

**Figure S5.** GC chromatogram for the *Macrocystis pyrifera* extract. The peaks for myristic acid (14:0), palmitic acid (16:0), stearidonic acid (18:4n-3), linoleic acid (18:2n-6), co-eluted [oleic acid (18:1) and  $\alpha$ -linolenic acid (18:3n-3)], arachidonic acid (20:4n-6) and eicosapentaenoic acid (20:5n-3) are indicated by dotted lines. IS (19:0): internal standard. 18:1 and 18:3n-3 were co-eluted and have similar fragmentation patterns by EI ionisation.

**Table S1.** Fatty acid composition of *Macrocystis pyrifera* lipid extract batches. Fatty acids were converted to fatty acid methyl esters (FAME) and analysed by gas chromatography-mass spectroscopy.

| Lipid numbers               | Common name                           | Extract 1 <sup>1</sup>    | Extract 2 <sup>2</sup> |
|-----------------------------|---------------------------------------|---------------------------|------------------------|
|                             |                                       | % total FAME <sup>3</sup> |                        |
| <b>Saturated</b>            |                                       |                           |                        |
| C14:0                       | Myristic acid                         | 18.7                      | 7.8                    |
| C16:0                       | Palmitic acid                         | 0.2                       | 20.5                   |
| C18:0                       | Stearic acid                          | 1.8                       | 2.5                    |
| C19:0                       | Nonadecylic acid                      | 15.1                      | -                      |
| <b>Total</b>                |                                       | <b>36.7</b>               | <b>31.4</b>            |
| <b>Monounsaturated</b>      |                                       |                           |                        |
| C16:1                       | Palmitoleic acid                      | 1.3                       | 2.1                    |
| C18:1                       | Oleic acid                            | 16.9                      | <sup>4</sup>           |
| <b>Total</b>                |                                       | <b>18.3</b>               | <b>2.2</b>             |
| <b>Polyunsaturated</b>      |                                       |                           |                        |
| <b>Omega-6</b>              |                                       |                           |                        |
| C18:2n-6                    | Linoleic acid                         | -                         | 7.7                    |
| C20:4n-6                    | Arachidonic acid                      | 13.5                      | 13.6                   |
| <b>Total</b>                |                                       | <b>14.5</b>               | <b>22.1</b>            |
| <b>Polyunsaturated</b>      |                                       |                           |                        |
| <b>Omega-3</b>              |                                       |                           |                        |
| C18:3n-3                    | $\alpha$ -linolenic acid              | 9.9                       | <sup>4</sup>           |
| C18:4n-3                    | Stearidonic acid                      | 10.1                      | 4.9                    |
| C20:5n-3                    | Eicosapentaenoic acid                 | -                         | 8.4                    |
| C22:5n-3                    | Docosapentaenoic acid                 | 10.0                      | -                      |
| <b>Total</b>                |                                       | <b>30.4</b>               | <b>13.8</b>            |
| <b>Co-elution</b>           |                                       |                           |                        |
| C18:1+C18:3n-3 <sup>4</sup> | Oleic acid / $\alpha$ -linolenic acid |                           | 30.7                   |

<sup>1</sup>Previously reported in [44].

<sup>2</sup>Prepared for this study using the Bligh and Dyer method [80].

<sup>3</sup>Lipids representing  $\geq 1\%$  of total FAME in either extract are reported.

<sup>4</sup>18:1 and 18:3n-3 were unable to be quantified owing to co-elution from the column and similar fragmentation patterns by EI ionisation.
